# Supplementary material for: Using Internet search data to examine the relationship between anti-Muslim and pro-ISIS sentiment in U.S. counties
Source: PubMed Central journal article supplement — Sci Adv. 2018 Jun 6;4(6):eaao5948. doi: 10.1126/sciadv.aao5948 (PMC5990314; doi:10.1126/sciadv.aao5948), 2018-06-06
Supplement: aao5948_SM.pdf [file aao5948_SM.pdf]

## Supplementary Materials for

### **Using Internet search data to examine the relationship between anti-Muslim and pro-ISIS sentiment in U.S. counties**

Christopher A. Bail, Friedolin Merhout, Peng Ding

Published 6 June 2018, *Sci. Adv.* **4**, eaao5948 (2018)

DOI: 10.1126/sciadv.aao5948

#### **This PDF file includes:**

- fig. S1. Standardized coefficients from two-stage least-squares regression model predicting pro-ISIS search rate normalized by Internet penetration in 2921 U.S. counties, 2014–2016.
- fig. S2. Standardized coefficients from two-stage least-squares regression model predicting pro-ISIS Internet search rate normalized for overall search activity in 3146 U.S. counties, 2014–2016.
- table S1. Results of Google Correlate searches to examine algorithmic confounding.
- table S2. Individuals who were indicted for terrorist activity or completed an attack by state.
- table S3. Individuals who were indicted for terrorist activity or completed an attack by year.

## Supplementary Materials

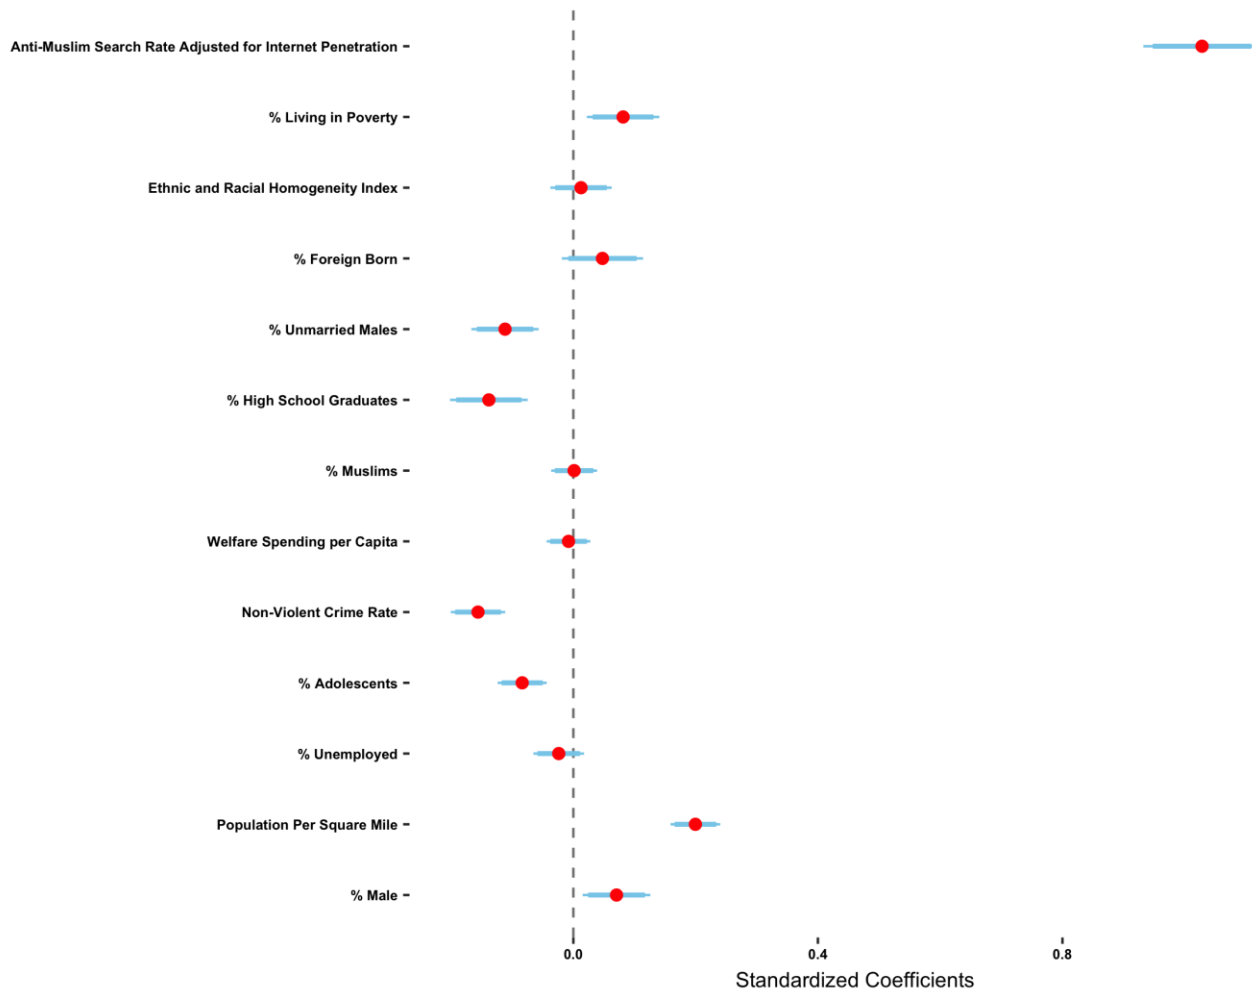

**fig. S1. Standardized coefficients from two-stage least-squares regression model predicting pro-ISIS search rate normalized by Internet penetration in 2921 U.S. counties, 2014–2016.** Red circles describe standardized coefficients, blue bars describe 90 and 95% confidence intervals. This figure provides a robustness check for the results presented in Figure 1. Anti-Muslim internet search rate normalized by the internet penetration rate remains the strongest predictor of the pro-ISIS internet search rate.

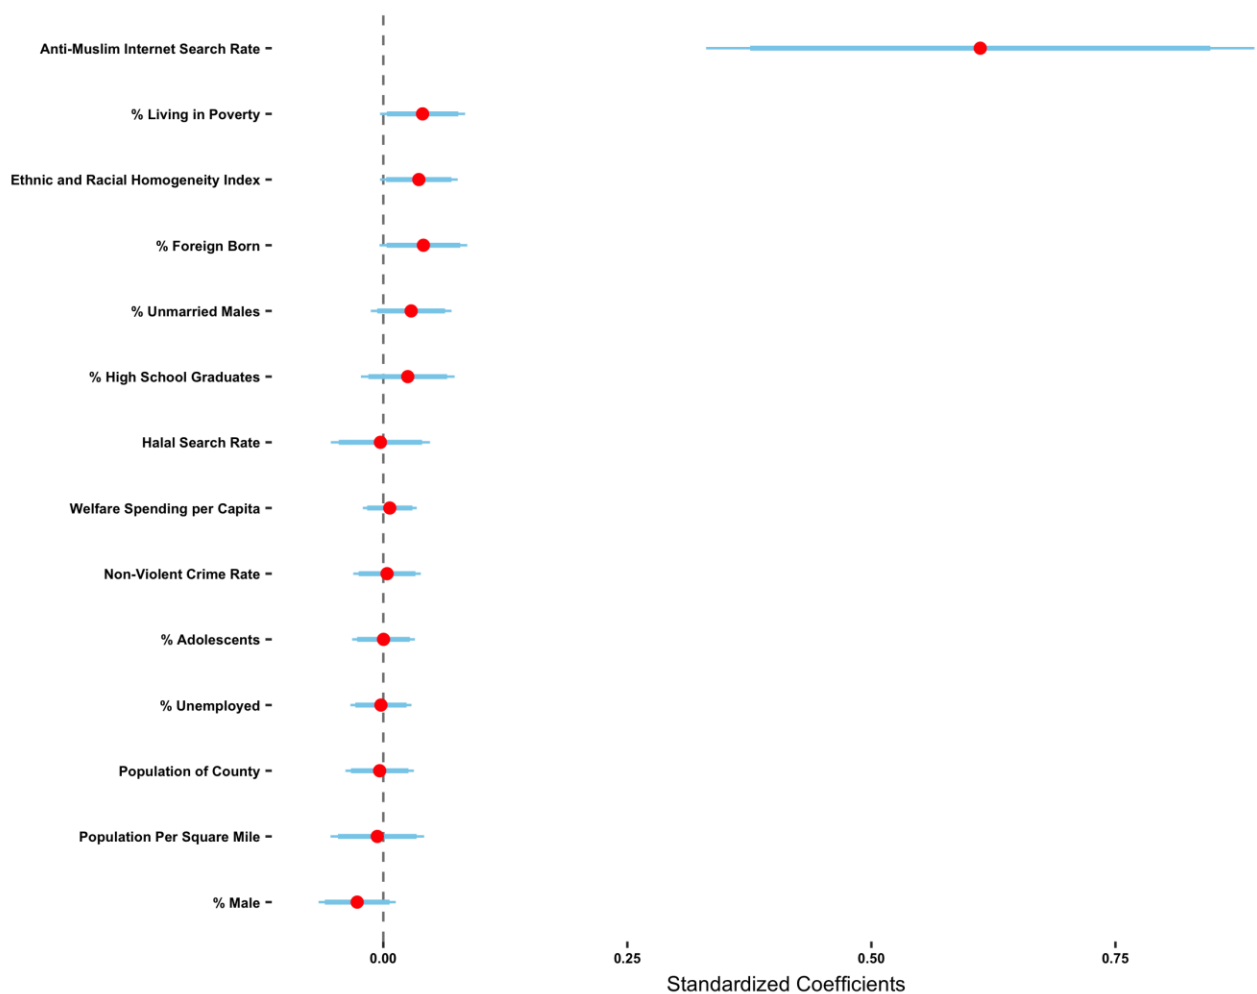

**fig. S2. Standardized coefficients from two-stage least-squares regression model predicting pro-ISIS Internet search rate normalized for overall search activity in 3146 U.S. counties, 2014–2016.** Red circles describe standardized coefficients, blue bars describe 90 and 95% confidence intervals. This figure provides a robustness check for the results presented in Figure 1. Anti-Muslim internet search rate normalized by the internet penetration rate remains the strongest and only statistically significant predictor of the pro-ISIS internet search rate when the proportion of Muslim residents is operationalized using an internet search volume indicator.

**table S1. Results of Google Correlate searches to examine algorithmic confounding.** These results present the 50 most commonly associated search terms with search phrases that may reflect (i) radicalization and (ii) anti-Muslim animus.

| Google Correlate Results for "Infidel" | Google Correlate Results for "Mussie" | Google Correlate Results for "Haji" |
|----------------------------------------|---------------------------------------|-------------------------------------|
| an al                                  | tussie mussie                         | jamaah                              |
| american be                            | tussie                                | pembuahan                           |
| what time is that                      | skibo castle                          | angkatan                            |
| lexington castle                       | turtle island                         | ibrani                              |
| nerg                                   | lualaba                               | kambing etawa                       |
| al an                                  | turtle islands                        | bahasa latin                        |
| catfish taste                          | origami for dummies                   | nabi ibrahim                        |
| shown                                  | saddle plate                          | etawa                               |
| hard enough                            | ferrets for dummies                   | siluman                             |
| berb                                   | orb and sceptre                       | sembilan                            |
| foam bubbles                           | chemcentral                           | alkitab                             |
| ky castle                              | nowack                                | syair lagu                          |
| how many taste buds                    | chem central                          | apa?                                |
| state capital of tennessee             | caritor                               | kamus bahasa                        |
| my name is nick                        | oswego, new york                      | aqiqah                              |
| untada                                 | boiling cauldron                      | lirik dan chord                     |
| cartoon superhero                      | ch-46                                 | renungan                            |
| american.                              | c-20                                  | dijual                              |
| beerg                                  | billy strayhorn                       | dan chord                           |
| amazon peanut butter                   | goen technologies                     | pelaut                              |
| bergand                                | anna nicole smith pics                | percaya diri                        |
| berg berg                              | tidningar                             | manusia pertama                     |
| man gets head chopped off              | nichole                               | lada hitam                          |
| greenfields song                       | oder-neisse                           | keunggulan                          |
| swatch times square                    | desogestrel                           | air tawar                           |
| berg.                                  | prince of denmark march               | bahasa ibrani                       |
| cut head off                           | fat anna                              | buat email                          |
| french word for hat                    | hard rock cafe hotel                  | rohani kristen                      |
| what does spam stand for               | fat anna nicole                       | ilmu                                |
| spam stand for                         | mexico new york                       | tekanan darah tinggi                |
| radical islamist                       | vortexes                              | tenaga dalam                        |
| red rectangle                          | city chemical                         | komunitas                           |
| what does spam                         | www.qwestdex.com                      | indikasi                            |
| elf in harry potter                    | building for dummies                  | tradisional                         |
| dallas cowboys safety                  | oswego new york                       | kamus bahasa arab                   |
| من يدى                                 | nichol                                | tekanan darah                       |
| befg                                   | wonder spot                           | depresi                             |
| ber video                              | anna nicole smith movies              | sel telur                           |
| islamic extremist groups               | shardik                               | perawatan                           |
| song the ride                          | keithurban.com                        | kelamin                             |
| film 11                                | picture agency                        | totok                               |
| islamic military                       | nowak                                 | dalam bahasa indonesia              |

**table S2. Individuals who were indicted for terrorist activity or completed an attack by state. (25)**

| State                | Number of Individuals |
|----------------------|-----------------------|
| Alabama              | 5                     |
| Alaska               | 2                     |
| Arizona              | 7                     |
| Arkansas             | 1                     |
| California           | 37                    |
| Colorado             | 7                     |
| Connecticut          | 2                     |
| Delaware             | 0                     |
| District of Columbia | 24                    |
| Florida              | 25                    |
| Georgia              | 3                     |
| Hawaii               | 0                     |
| Idaho                | 0                     |
| Illinois             | 17                    |
| Indiana              | 2                     |
| Iowa                 | 0                     |
| Kansas               | 2                     |
| Kentucky             | 2                     |
| Louisiana            | 0                     |
| Maine                | 1                     |
| Maryland             | 5                     |
| Massachusetts        | 10                    |
| Michigan             | 6                     |
| Minnesota            | 40                    |
| Mississippi          | 2                     |
| Missouri             | 2                     |
| Montana              | 0                     |
| Nebraska             | 0                     |
| Nevada               | 0                     |
| New Hampshire        | 0                     |
| New Jersey           | 14                    |
| New Mexico           | 0                     |
| New York             | 52                    |
| North Carolina       | 17                    |
| North Dakota         | 0                     |
| Ohio                 | 17                    |
| Oklahoma             | 1                     |
| Oregon               | 8                     |
| Pennsylvania         | 6                     |
| Rhode Island         | 1                     |
| South Carolina       | 1                     |
| South Dakota         | 0                     |
| Tennessee            | 3                     |
| Texas                | 20                    |
| Utah                 | 1                     |
| Vermont              | 0                     |
| Virginia             | 9                     |
| Washington           | 13                    |
| West Virginia        | 0                     |
| Wisconsin            | 1                     |
| Wyoming              | 0                     |
| Total                | 366                   |

**table S3. Individuals who were indicted for terrorist activity or completed an attack by year. (25)**

| Year | Number of Individuals |
|------|-----------------------|
| 2001 | 2                     |
| 2002 | 18                    |
| 2003 | 25                    |
| 2004 | 8                     |
| 2005 | 10                    |
| 2006 | 16                    |
| 2007 | 16                    |
| 2008 | 3                     |
| 2009 | 50                    |
| 2010 | 27                    |
| 2011 | 22                    |
| 2012 | 18                    |
| 2013 | 23                    |
| 2014 | 44                    |
| 2015 | 83                    |
| 2016 | 24                    |
